# Supplementary material
Source: ML conference proceedings conference paper supplement (https://openaccess.thecvf.com/content/CVPR2023/html/Rivas-Manzaneque_NeRFLight_Fast_and_CVPR_2023_paper.html)
Supplement: Supplementary file 1 [file Rivas-Manzaneque_NeRFLight_Fast_and_CVPR_2023_supplemental.pdf]

# NeRFLight Supplemental Materials

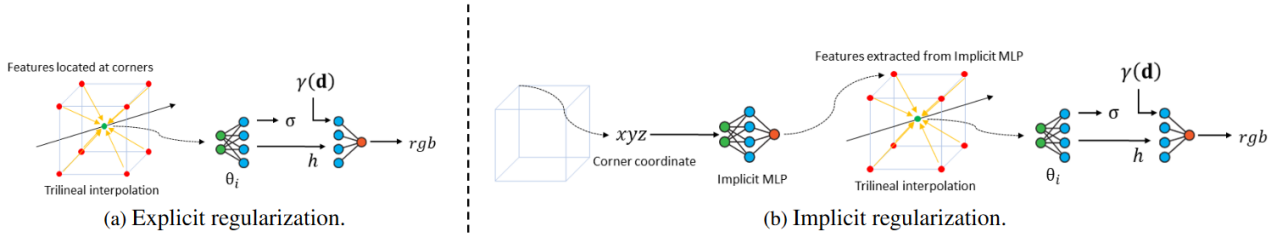

Figure 7. **Grid regularizations** Features can be obtained either using an auto-decoder architecture (a) where the features are directly optimized or using a auto-encoder architecture (b) where an implicit MLP is optimized to obtain the features depending on their spatial position.

In this section, we provide additional details about the architecture of the MLPs used in our work together with a more detailed description of the feature optimization methods applied (explicit and implicit regularization). We also report more detailed per-scene quantitative results and additional qualitative results.

## A. Additional MLP architecture details

Fig. 7 shows the two different training strategies that are used to train NeRFLight. In the coarse stage, features are initialized randomly and optimized using explicit regularization. However, at the fine stage, the features are first optimized using an auto-encoder architecture, where an implicit MLP is used to obtain a feature value depending on its spatial location. After 1000 epochs, the features for each of the corners in the grid are extracted. These values are used as initialization for an auto-decoder architecture, where features are, once again, directly optimized.

Fig. 8 shows the architecture of the implicit MLP used for implicit regularization. It is composed of one input layer and eight hidden layers of 512 neurons activated using ReLU and an output layer of 32 neurons without activation. Positional encoding is applied to the corner coordinates. We use ten frequencies for this positional encoding.

Fig. 9 shows the architecture of a density decoder and a color decoder. Each of the density decoders is composed of one input layer, one hidden layer, and one output layer. They take the integrated feature (dimension 32) as input and output the density value  $\sigma$  and an intermediate representation  $h$ . Each of the layers is activated with ReLU activation except for the neurons of the last layer that correspond to the intermediate representation, where no activation is used. This intermediate representation is concatenated with the positional encoding of the by direction to produce the input of the color decoder. Finally, the color decoder, composed of a ReLU-activated input layer of 32 neurons and a sigmoid-activated output layer of 3 neurons, obtains the

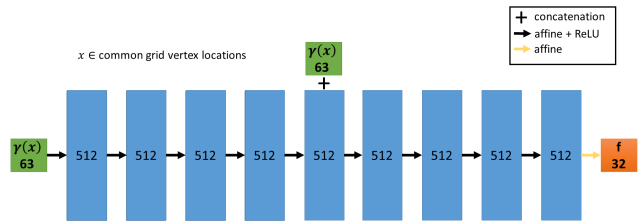

Figure 8. **Implicit MLP architecture.** The implicit MLP is used to obtain a robust initialization of the feture grid. It is evaluated on the corners of the common feature grid.

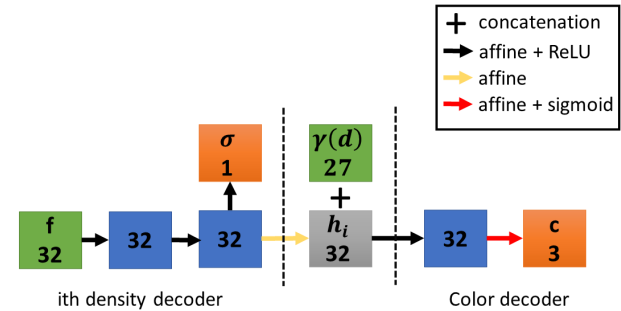

Figure 9. **Density and color decoders.** Depending on the location of the voxel, one of the  $N$  density decoders obtains the density value at the given voxel and an intermediate representation from the integrated feature. Then, the color decoder used the intermediate representation and the direction positional encoding to obtain the color value.

color of the given interval. Four frequencies are used for the direction positional encoding.

## B. Additional Results

Fig. 10 shows the same experiment as Fig. 5 but using a Lego scene rotated ( $14^\circ$ ,  $28^\circ$ ,  $64^\circ$ ) on the X-Y-Z axes. The goal of this experiment is to show that our approach is also

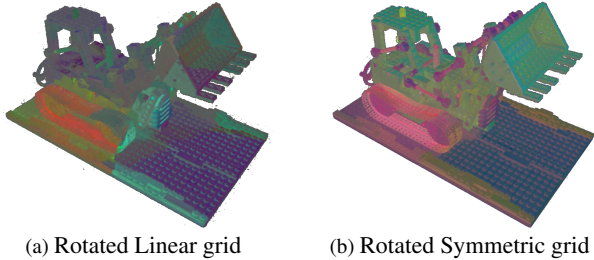

Figure 10. **PCA decomposition** of density decoder’s outputs of the rotated Lego Scene. The symmetric grid shows to be more stable.

| Orientation  | PSNR $\uparrow$ | SSIM $\uparrow$ | LPIPS $\downarrow$ |
|--------------|-----------------|-----------------|--------------------|
| Axis aligned | 31.41           | 0.968           | 0.039              |
| Rotated      | 31.32           | 0.967           | 0.039              |

Table 3. Results on Lego scene with and w/o rotation.

robust for the case where the symmetry axes of the scenes are not aligned with the axes of the scene (as occurs in some scenes of the NeRF Synthetic dataset. Tab. 3 shows that the metrics obtained by our model in both scenes (original and rotated) are similar. Tab. 4 shows the results on Lego Scene from the NeRF Synthetic dataset of NeRFLight using different regularizations. It can be seen how all of them (explicit, implicit, and hybrid) obtain high-quality results. While explicit regularization obtains the lowest quality metrics, it requires less time and GPU memory. For the lego scene, the training time was 16 hours and the peak GPU memory usage was 22GB, a significant reduction compared with the 60 hours and the 40GB needed by the hybrid regularization.

In Tab. 5, we show a per-scene comparison of the rendering quality between NeRFLight and all the baselines we compared with in NeRF synthetic dataset. In Tab. 6, we do the same for the Tanks and Temples dataset. We also provide the model size and frame rate for NeRF synthetic dataset (Tab. 7) and the model size for the Tanks and Temples dataset Tab. 8. In these results, we also add the DIVER-64 model [48] for NeRF Synthetic dataset, while the tables shown in the paper only reports the results from DIVER-32 since it is the model of [48] with the best FPS/MB ratio, while the quality metrics are really similar between both models.

As explained in the paper, in Tab. 1 we provide the results of Instant-NGP for Tanks and Temples dataset tuning its hyperparameters so that the model size matches NeRF-light. We use a hash table size of  $2^{22}$  and the finest resolution is set to 256. In Tab. 6 also shows the results of a larger model of Instant-NGP using the same size for the hash table and the finest resolution of 512. It is marked as (l) while the

| Reg.  | PSNR $\uparrow$ | SSIM $\uparrow$ | LPIPS $\downarrow$ |
|-------|-----------------|-----------------|--------------------|
| Ex    | 33.02           | 0.975           | 0.016              |
| Im    | 33.24           | 0.979           | 0.013              |
| Im-Ex | <b>33.84</b>    | <b>0.985</b>    | <b>0.011</b>       |

Table 4. Results on Lego scene using different regularizations

Instant-NGP shown in the paper is marked as (s).

Finally, we also provide additional qualitative results in Fig. 12 and Fig. 11.

|             | PSNR $\uparrow$ |       |       |        |       |           |       |       |              |
|-------------|-----------------|-------|-------|--------|-------|-----------|-------|-------|--------------|
|             | Chair           | Drums | Ficus | Hotdog | Lego  | Materials | Mic   | Ship  | Mean         |
| NeRF*       | 33.00           | 25.01 | 30.13 | 36.18  | 32.54 | 29.62     | 32.91 | 28.65 | 31.00        |
| JAXNeRF+*   | 35.35           | 25.65 | 32.77 | 37.58  | 35.35 | 30.29     | 36.52 | 30.48 | 33.00        |
| JAXNeRF*    | 33.88           | 25.08 | 30.51 | 36.91  | 33.24 | 30.03     | 34.52 | 29.07 | 31.65        |
| AutoInt*    | 25.60           | 20.78 | 22.47 | 32.33  | 25.09 | 25.90     | 28.10 | 24.15 | 25.55        |
| SNeRG(PNG)  | 33.24           | 24.57 | 29.32 | 34.33  | 33.82 | 27.21     | 32.60 | 27.97 | 30.38        |
| SNeRG(H264) | -               | -     | -     | -      | -     | -         | -     | -     | 29.86        |
| Eff-NeRF    | -               | -     | -     | -      | -     | -         | -     | -     | 31.68        |
| KiloNeRF    | 32.91           | 25.25 | 29.76 | 35.56  | 33.02 | 29.20     | 33.06 | 29.23 | 31.00        |
| Plenotrees  | 34.66           | 25.31 | 30.79 | 36.79  | 32.95 | 29.76     | 33.97 | 29.42 | 31.71        |
| TensorRF-CP | 33.60           | 25.17 | 30.72 | 36.24  | 34.05 | 30.10     | 33.77 | 28.84 | 31.56        |
| TensorRF-VM | 35.76           | 26.01 | 33.99 | 37.41  | 36.46 | 30.12     | 34.51 | 30.77 | <u>33.14</u> |
| Instant-NGP | 35.00           | 26.02 | 33.51 | 37.40  | 36.39 | 29.78     | 36.22 | 31.10 | <b>33.18</b> |
| DIVeR-64    | 34.35           | 25.38 | 31.76 | 36.76  | 35.49 | 29.61     | 34.57 | 30.48 | 32.30        |
| DIVeR-32    | 34.09           | 25.40 | 32.02 | 36.35  | 35.17 | 29.24     | 34.53 | 30.14 | 32.12        |
| NeRFLight   | 32.76           | 25.60 | 31.65 | 35.96  | 33.84 | 29.00     | 33.1  | 29.38 | 31.41        |

  

|             | SSIM $\uparrow$ |       |       |        |        |           |       |       |              |
|-------------|-----------------|-------|-------|--------|--------|-----------|-------|-------|--------------|
|             | Chair           | Drums | Ficus | Hotdog | Lego   | Materials | Mic   | Ship  | Mean         |
| NeRF*       | 0.967           | 0.925 | 0.964 | 0.974  | 0.961  | 0.952     | 0.987 | 0.865 | 0.947        |
| JAXNeRF+*   | 0.982           | 0.936 | 0.980 | 0.983  | 0.979  | 0.956     | 0.991 | 0.887 | 0.962        |
| JAXNeRF*    | 0.974           | 0.927 | 0.967 | 0.979  | 0.968  | 0.952     | 0.987 | 0.865 | 0.952        |
| AutoInt*    | 0.928           | 0.861 | 0.898 | 0.974  | 0.900  | 0.930     | 0.948 | 0.852 | 0.911        |
| SNeRG(PNG)  | 0.975           | 0.929 | 0.967 | 0.971  | 0.973  | 0.938     | 0.982 | 0.865 | 0.950        |
| SNeRG(H264) | -               | -     | -     | -      | -      | -         | -     | -     | 0.938        |
| Eff-NeRF    | -               | -     | -     | -      | -      | -         | -     | -     | 0.954        |
| KiloNeRF    | 0.970           | 0.930 | 0.970 | 0.980  | 0.9700 | 0.950     | 0.980 | 0.880 | 0.950        |
| Plenotrees  | 0.981           | 0.933 | 0.970 | 0.982  | 0.971  | 0.955     | 0.987 | 0.884 | 0.958        |
| TensorRF-CP | 0.973           | 0.921 | 0.965 | 0.975  | 0.971  | 0.950     | 0.983 | 0.857 | 0.949        |
| TensorRF-VM | 0.985           | 0.937 | 0.982 | 0.982  | 0.983  | 0.952     | 0.988 | 0.895 | 0.963        |
| Instant-NGP | 0.987           | 0.950 | 0.987 | 0.989  | 0.988  | 0.964     | 0.991 | 0.938 | <b>0.974</b> |
| DIVeR-64    | -               | -     | -     | -      | -      | -         | -     | -     | -            |
| DIVeR-32    | 0.977           | 0.932 | 0.977 | 0.978  | 0.978  | 0.946     | 0.987 | 0.885 | 0.958        |
| NeRFLight   | 0.978           | 0.954 | 0.983 | 0.990  | 0.985  | 0.949     | 0.989 | 0.927 | <u>0.968</u> |

  

|             | LPIPS $\downarrow$ |       |       |        |       |           |       |       |              |
|-------------|--------------------|-------|-------|--------|-------|-----------|-------|-------|--------------|
|             | Chair              | Drums | Ficus | Hotdog | Lego  | Materials | Mic   | Ship  | Mean         |
| NeRF*       | 0.046              | 0.091 | 0.044 | 0.121  | 0.050 | 0.063     | 0.028 | 0.206 | 0.081        |
| JAXNeRF+*   | 0.017              | 0.057 | 0.018 | 0.022  | 0.017 | 0.041     | 0.008 | 0.123 | 0.038        |
| JAXNeRF*    | 0.027              | 0.070 | 0.033 | 0.030  | 0.030 | 0.048     | 0.013 | 0.156 | 0.051        |
| AutoInt*    | 0.141              | 0.224 | 0.148 | 0.080  | 0.175 | 0.136     | 0.131 | 0.323 | 0.170        |
| SNeRG(PNG)  | 0.025              | 0.061 | 0.028 | 0.043  | 0.022 | 0.052     | 0.016 | 0.156 | 0.050        |
| SNeRG(H264) | -                  | -     | -     | -      | -     | -         | -     | -     | 0.065        |
| Eff-NeRF    | -                  | -     | -     | -      | -     | -         | -     | -     | <b>0.020</b> |
| KiloNeRF    | 0.020              | 0.050 | 0.020 | 0.020  | 0.020 | 0.020     | 0.010 | 0.080 | <u>0.030</u> |
| Plenotrees  | 0.022              | 0.076 | 0.038 | 0.032  | 0.034 | 0.059     | 0.017 | 0.144 | 0.053        |
| TensorRF-CP | 0.044              | 0.114 | 0.058 | 0.052  | 0.038 | 0.068     | 0.035 | 0.196 | 0.076        |
| TensorRF-VM | 0.022              | 0.073 | 0.022 | 0.032  | 0.018 | 0.058     | 0.015 | 0.138 | 0.047        |
| Instant-NGP | 0.012              | 0.08  | 0.053 | 0.013  | 0.014 | 0.063     | 0.023 | 0.086 | 0.043        |
| DIVeR-64    | -                  | -     | -     | -      | -     | -         | -     | -     | -            |
| DIVeR-32    | 0.014              | 0.058 | 0.020 | 0.019  | 0.010 | 0.034     | 0.011 | 0.100 | 0.033        |
| NeRFLight   | 0.025              | 0.073 | 0.036 | 0.010  | 0.011 | 0.045     | 0.030 | 0.08  | 0.039        |

Table 5. Rendering quality on NeRF synthetic dataset

|                | PSNR $\uparrow$ |             |        |          |       | Mean         |
|----------------|-----------------|-------------|--------|----------|-------|--------------|
|                | Barn            | Caterpillar | Family | Ignatius | Truck |              |
| NeRF           | 27.71           | 25.87       | 33.33  | 27.79    | 26.92 | 28.32        |
| KiloNeRF       | 27.81           | 25.61       | 33.65  | 27.92    | 27.04 | 28.41        |
| Plenotrees     | 26.80           | 25.29       | 32.85  | 28.19    | 26.83 | 27.99        |
| TensoRF-CP     | 26.74           | 24.73       | 32.39  | 27.86    | 26.25 | 27.59        |
| TensoRF-VM     | 27.22           | 26.19       | 33.92  | 28.34    | 27.14 | <u>28.56</u> |
| Instant-NGP(s) | 26.51           | 24.9        | 32.98  | 27.63    | 25.49 | 27.50        |
| Instant-NGP(l) | 27.41           | 26.61       | 34.68  | 28.23    | 27.92 | <b>28.97</b> |
| DIVeR-32       | 26.7            | 25.8        | 33.34  | 27.42    | 27.81 | 28.21        |
| NeRFLight      | 26.42           | 25.3        | 33.23  | 27.24    | 27.22 | 27.85        |

  

|                | SSIM $\uparrow$ |             |        |          |       | Mean         |
|----------------|-----------------|-------------|--------|----------|-------|--------------|
|                | Barn            | Caterpillar | Family | Ignatius | Truck |              |
| NeRF           | 0.85            | 0.89        | 0.95   | 0.94     | 0.89  | 0.90         |
| KiloNeRF       | 0.85            | 0.90        | 0.96   | 0.94     | 0.90  | 0.910        |
| Plenotrees     | 0.856           | 0.907       | 0.962  | 0.948    | 0.914 | 0.917        |
| TensoRF-CP     | 0.839           | 0.879       | 0.948  | 0.934    | 0.885 | 0.897        |
| TensoRF-VM     | 0.864           | 0.912       | 0.965  | 0.948    | 0.914 | 0.920        |
| Instant-NGP(s) | 0.897           | 0.924       | 0.968  | 0.963    | 0.921 | 0.935        |
| Instant-NGP(l) | 0.910           | 0.940       | 0.980  | 0.970    | 0.942 | <b>0.948</b> |
| DIVeR-32       | 0.843           | 0.900       | 0.954  | 0.932    | 0.900 | 0.906        |
| NeRFLight      | 0.891           | 0.927       | 0.976  | 0.958    | 0.941 | <u>0.939</u> |

  

|                | LPIPS $\downarrow$ |             |        |          |       | Mean         |
|----------------|--------------------|-------------|--------|----------|-------|--------------|
|                | Barn               | Caterpillar | Family | Ignatius | Truck |              |
| NeRF           | 0.19               | 0.12        | 0.05   | 0.08     | 0.11  | 0.11         |
| KiloNeRF       | 0.16               | 0.10        | 0.04   | 0.06     | 0.10  | 0.090        |
| Plenotrees     | 0.226              | 0.148       | 0.069  | 0.080    | 0.130 | 0.131        |
| TensoRF-CP     | 0.237              | 0.176       | 0.063  | 0.089    | 0.154 | 0.144        |
| TensoRF-VM     | 0.217              | 0.139       | 0.057  | 0.081    | 0.129 | 0.125        |
| Instant-NGP(s) | 0.151              | 0.056       | 0.036  | 0.075    | 0.060 | <u>0.076</u> |
| Instant-NGP(l) | 0.142              | 0.051       | 0.034  | 0.064    | 0.053 | <b>0.069</b> |
| DIVeR-32       | 0.142              | 0.095       | 0.041  | 0.054    | 0.079 | 0.082        |
| NeRFLight      | 0.139              | 0.100       | 0.043  | 0.055    | 0.083 | 0.084        |

Table 6. Rendering quality on the Tanks and Temples dataset

|             | MB↓   |       |       |        |      |           |      |      |            |
|-------------|-------|-------|-------|--------|------|-----------|------|------|------------|
|             | Chair | Drums | Ficus | Hotdog | Lego | Materials | Mic  | Ship | Mean       |
| NeRF*       | 5     | 5     | 5     | 5      | 5    | 5         | 5    | 5    | 5          |
| JAXNeRF+*   | 18    | 18    | 18    | 18     | 18   | 18        | 18   | 18   | 18         |
| JAXNeRF*    | 4.8   | 4.8   | 4.8   | 4.8    | 4.8  | 4.8       | 4.8  | 4.8  | <u>4.8</u> |
| AutoInt*    | 5     | 5     | 5     | 5      | 5    | 5         | 5    | 5    | 5          |
| SNeRG(PNG)  | -     | -     | -     | -      | -    | -         | -    | -    | 84         |
| SNeRG(H264) | -     | -     | -     | -      | -    | -         | -    | -    | 30.2       |
| Eff-NeRF    | -     | -     | -     | -      | -    | -         | -    | -    | 648        |
| KiloNeRF    | 204   | -     | -     | -      | 108  | -         | -    | 173  | 161        |
| Plenotrees  | 832   | 1239  | 1792  | 2683   | 2068 | 3686      | 443  | 2693 | 1930       |
| TensorRF-CP | 3.71  | 3.78  | 3.73  | 4.23   | 3.74 | 4.49      | 3.83 | 3.87 | <b>3.9</b> |
| TensorRF-VM | 66.7  | 69.9  | 68.6  | 83.8   | 81.5 | 67.8      | 70.2 | 68.1 | 71.8       |
| Instant-NGP | 27    | 27    | 27    | 27     | 27   | 27        | 27   | 27   | 27         |
| DIVeR-64    | 55    | 42    | 49    | 80     | 64   | 62        | 24   | 118  | 62         |
| DIVeR-32    | 55    | 56    | 47    | 84     | 64   | 62        | 24   | 151  | 68         |
| NeRFLight   | 9     | 15    | 9     | 16     | 13   | 11        | 10   | 30   | 14         |

|             | FPS↑  |       |       |        |      |           |      |      |            |
|-------------|-------|-------|-------|--------|------|-----------|------|------|------------|
|             | Chair | Drums | Ficus | Hotdog | Lego | Materials | Mic  | Ship | Mean       |
| NeRF*       | -     | -     | -     | -      | -    | -         | -    | -    | 0.03       |
| JAXNeRF+*   | -     | -     | -     | -      | -    | -         | -    | -    | 0.01       |
| JAXNeRF*    | -     | -     | -     | -      | -    | -         | -    | -    | 0.05       |
| AutoInt*    | -     | -     | -     | -      | -    | -         | -    | -    | 0.38       |
| SNeRG(PNG)  | -     | -     | -     | -      | -    | -         | -    | -    | <u>202</u> |
| SNeRG(H264) | -     | -     | -     | -      | -    | -         | -    | -    | <u>202</u> |
| Eff-NeRF    | -     | -     | -     | -      | -    | -         | -    | -    | <b>238</b> |
| KiloNeRF    | 103   | -     | -     | -      | 88   | -         | -    | 45   | 79         |
| Plenotrees  | 312   | 302   | 116   | 89     | 280  | 70        | 320  | 58   | 168        |
| TensorRF-CP | 0.66  | 0.752 | 0.15  | 0.21   | 0.24 | 0.42      | 0.69 | 0.49 | 0.45       |
| TensorRF-VM | 0.60  | 0.747 | 0.08  | 0.11   | 0.17 | 0.36      | 0.61 | 0.42 | 0.38       |
| Instant-NGP | 85    | 61    | 68    | 63     | 66   | 37        | 99   | 17   | 62         |
| DIVeR-64    | 101   | 87    | 78    | 82     | 168  | 70        | 150  | 78   | 102        |
| DIVeR-32    | 160   | 117   | 108   | 117    | 200  | 114       | 168  | 79   | 133        |
| NeRFLight   | 223   | 252   | 149   | 130    | 215  | 121       | 201  | 153  | 181        |

|             | FPS/MB↑ |       |        |        |       |           |       |       |               |
|-------------|---------|-------|--------|--------|-------|-----------|-------|-------|---------------|
|             | Chair   | Drums | Ficus  | Hotdog | Lego  | Materials | Mic   | Ship  | Mean          |
| NeRF*       | -       | -     | -      | -      | -     | -         | -     | -     | 0.006         |
| JAXNeRF+*   | -       | -     | -      | -      | -     | -         | -     | -     | 0.0006        |
| JAXNeRF*    | -       | -     | -      | -      | -     | -         | -     | -     | 0.0104        |
| AutoInt*    | -       | -     | -      | -      | -     | -         | -     | -     | 0.076         |
| SNeRG(PNG)  | -       | -     | -      | -      | -     | -         | -     | -     | 2.404         |
| SNeRG(H264) | -       | -     | -      | -      | -     | -         | -     | -     | <u>6.689</u>  |
| Eff-NeRF    | -       | -     | -      | -      | -     | -         | -     | -     | 0.367         |
| KiloNeRF    | 0.505   | -     | -      | -      | 0.815 | -         | -     | 0.260 | 0.490         |
| Plenotrees  | 0.375   | 0.244 | 0.065  | 0.033  | 0.135 | 0.019     | 0.722 | 0.022 | 0.085         |
| TensorRF-CP | 0.178   | 0.199 | 0.040  | 0.050  | 0.064 | 0.094     | 0.180 | 0.123 | 0.115         |
| TensorRF-VM | 0.009   | 0.011 | 0.0012 | 0.0013 | 0.002 | 0.005     | 0.009 | 0.006 | 0.0053        |
| Instant-NGP | 3.15    | 2.26  | 2.52   | 2.33   | 2.44  | 1.37      | 3.67  | 0.63  | 2.296         |
| DIVeR-64    | 1.84    | 2.07  | 1.59   | 1.025  | 2.625 | 1.129     | 6.25  | 0.661 | 1.645         |
| DIVeR-32    | 2.91    | 2.09  | 2.30   | 1.393  | 3.125 | 1.84      | 7.00  | 0.52  | 1.956         |
| NeRFLight   | 24.78   | 16.8  | 16.56  | 8.125  | 16.54 | 11        | 20.1  | 5.1   | <b>12.929</b> |

Table 7. Model size and rendering speed on NeRF synthetic dataset

|                | MB↓  |             |        |          |       | Mean        |
|----------------|------|-------------|--------|----------|-------|-------------|
|                | Barn | Caterpillar | Family | Ignatius | Truck |             |
| NeRF           | 5    | 5           | 5      | 5        | 5     | <u>5</u>    |
| KiloNeRF       | -    | -           | -      | -        | -     | -           |
| Plenotrees     | 2509 | 2365        | 2928   | 3031     | 2314  | 2629        |
| TensorRF-CP    | 4.2  | 3.93        | 4.07   | 4.32     | 4.64  | <b>4.23</b> |
| TensorRF-VM    | 71.5 | 67.4        | 66.7   | 80.7     | 70.6  | 71.4        |
| Instant-NGP(s) | 40   | 40          | 40     | 40       | 40    | 40          |
| Instant-NGP(l) | 116  | 116         | 116    | 116      | 116   | 116         |
| DIVeR-32       | 85   | 92          | 133    | 154      | 117   | 116         |
| NeRFLight      | 31   | 50          | 24     | 43       | 52    | 40          |

  

|                | FPS↑ |             |        |          |       | Mean      |
|----------------|------|-------------|--------|----------|-------|-----------|
|                | Barn | Caterpillar | Family | Ignatius | Truck |           |
| NeRF*          | -    | -           | -      | -        | -     | 0.005     |
| KiloNeRF       | -    | -           | -      | -        | -     | 41.3      |
| Plenotrees     | 23   | 37          | 58     | 51       | 42    | 42        |
| TensorRF-CP    | 0.15 | 0.35        | 0.35   | 0.28     | 0.21  | 0.27      |
| TensorRF-VM    | 0.02 | 0.24        | 0.22   | 0.18     | 0.16  | 0.16      |
| Instant-NGP(s) | 16   | 30          | 38     | 34       | 27    | 29        |
| Instant-NGP(l) | 16   | 30          | 38     | 34       | 27    | 29        |
| DIVeR-32       | 31   | 56          | 70     | 66       | 48    | <u>54</u> |
| NeRFLight      | 45   | 97          | 90     | 75       | 82    | <b>78</b> |

  

|                | FPS/MB↑ |             |        |          |       | Mean         |
|----------------|---------|-------------|--------|----------|-------|--------------|
|                | Barn    | Caterpillar | Family | Ignatius | Truck |              |
| NeRF*          | -       | -           | -      | -        | -     | 0.001        |
| KiloNeRF       | -       | -           | -      | -        | -     | -            |
| Plenotrees     | 0.009   | 0.016       | 0.020  | 0.017    | 0.018 | 0.016        |
| TensorRF-CP    | 0.036   | 0.089       | 0.086  | 0.065    | 0.045 | 0.064        |
| TensorRF-VM    | 0.0003  | 0.004       | 0.003  | 0.002    | 0.002 | 0.0022       |
| Instant-NGP(s) | 0.4     | 0.75        | 0.95   | 0.85     | 0.675 | <u>0.725</u> |
| Instant-NGP(l) | 0.14    | 0.26        | 0.33   | 0.293    | 0.232 | 0.25         |
| DIVeR-32       | 0.36    | 0.61        | 0.53   | 0.43     | 0.41  | 0.47         |
| NeRFLight      | 1.45    | 1.94        | 3.75   | 1.74     | 1.58  | <b>1.95</b>  |

Table 8. Model size on Tanks and Temples dataset.

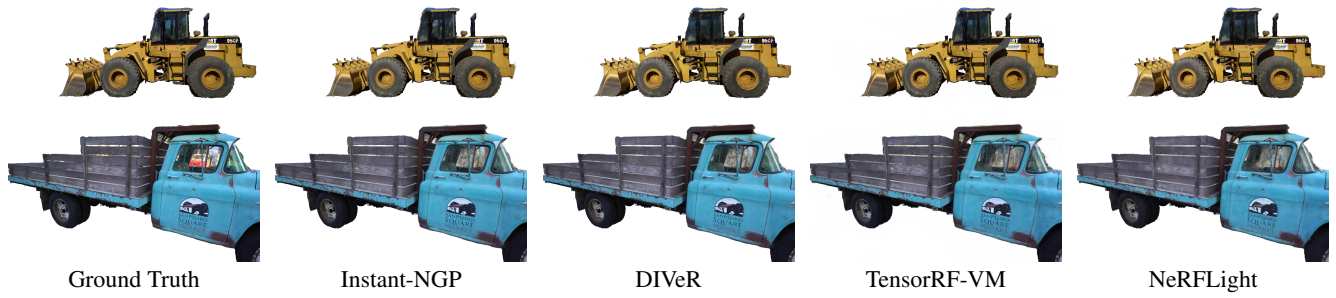

Figure 11. Additional qualitative results on Tanks and Temples.

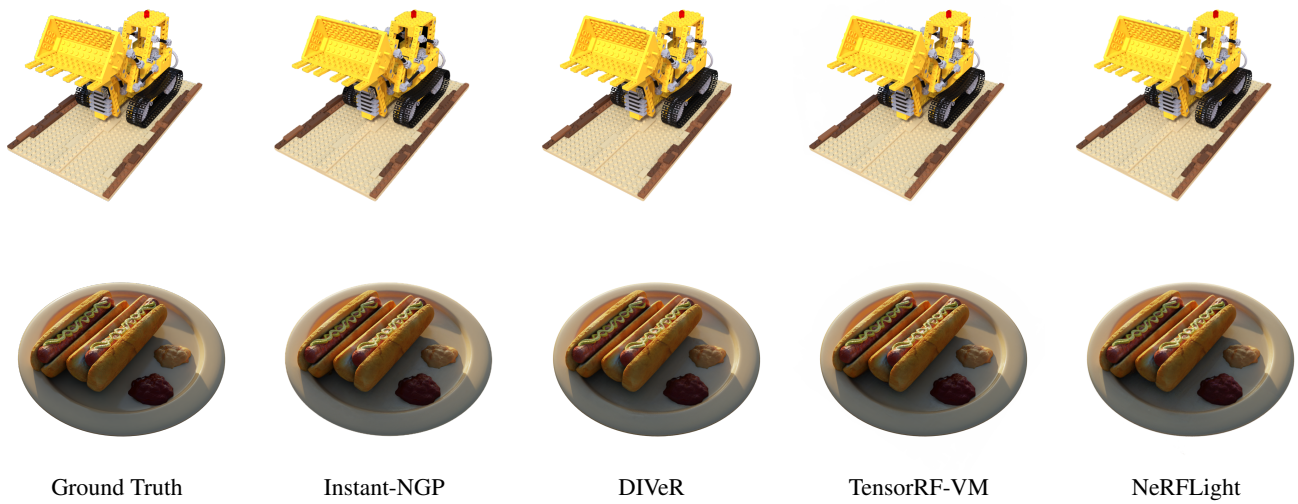

Figure 12. Additional qualitative results on NeRF Synthetic.
